# Supplementary material for: Mesoporous CuO–ZnO p–n heterojunction based nanocomposites with high specific surface area for enhanced photocatalysis and electrochemical sensing
Source: Royal Society of Chemistry journal article supplement (doi:10.1039/c5cy01573a), 2015-11-24
Supplement: c5cy01573a1.pdf [file c5cy01573a1.pdf]

## Electronic Supplementary Information – 1

Mesoporous CuO-ZnO p-n heterojunction with high specific surface area for enhanced photocatalysis and electrochemical sensing

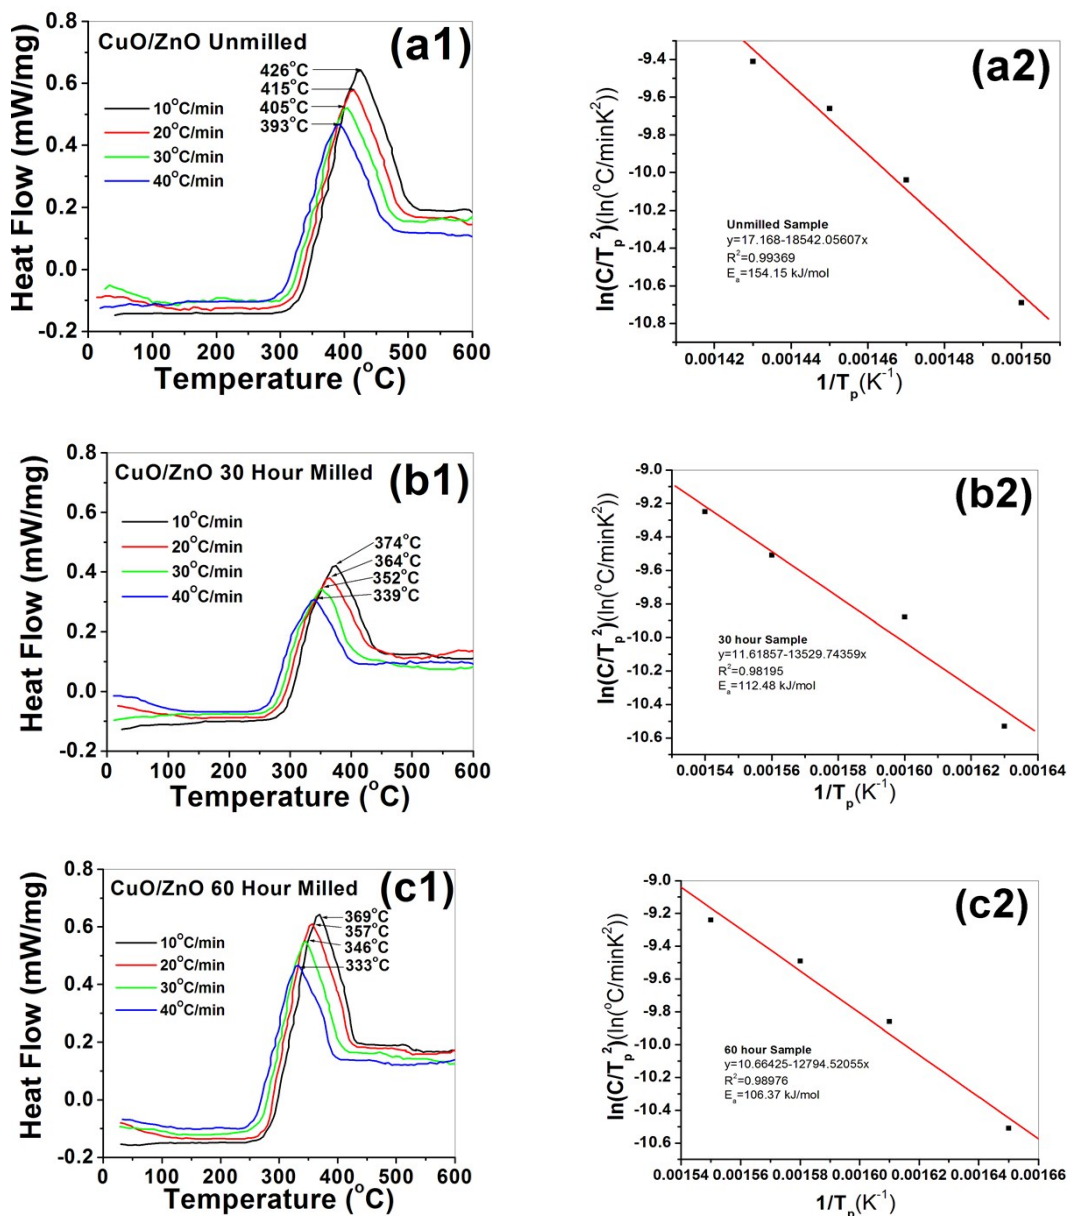

Figures: DSC thermograms for (a1) unmilled (b1) 30 hour milled and (c1) 60 hour milled samples. Kissinger plot for (a2) unmilled (b2) 30 hour milled and (c2) 60 hour milled samples for the determination of activation energy of the three systems.
