# Supplementary material for: Mesoporous CuO–ZnO p–n heterojunction based nanocomposites with high specific surface area for enhanced photocatalysis and electrochemical sensing
Source: Royal Society of Chemistry journal article supplement (doi:10.1039/c5cy01573a), 2015-11-24
Supplement: c5cy01573a2.pdf [file c5cy01573a2.pdf]

Electronic Supplementary Information – 2

Mesoporous CuO-ZnO p-n heterojunction with high specific surface area for  
enhanced photocatalysis and electrochemical sensing

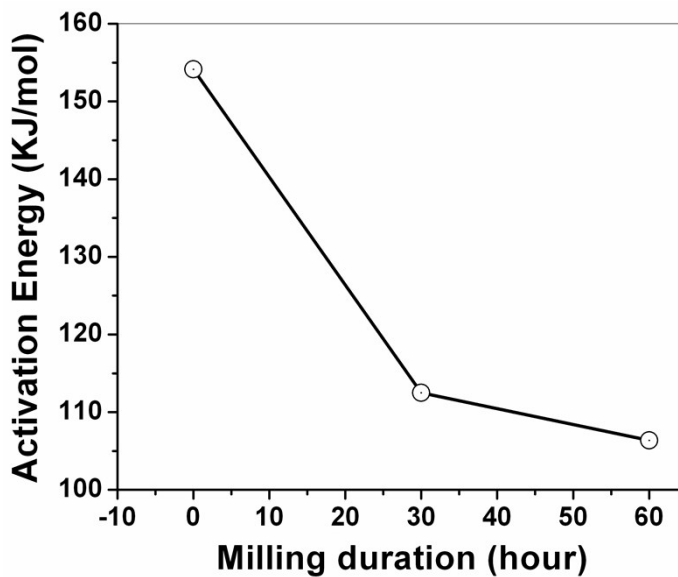

Figure: Variation of activation energy with milling duration.
