# Supplementary material for: Mesoporous CuO–ZnO p–n heterojunction based nanocomposites with high specific surface area for enhanced photocatalysis and electrochemical sensing
Source: Royal Society of Chemistry journal article supplement (doi:10.1039/c5cy01573a), 2015-11-24
Supplement: c5cy01573a3.pdf [file c5cy01573a3.pdf]

### Electronic Supplementary Information – 3

Mesoporous CuO-ZnO p-n heterojunction with high specific surface area for  
enhanced photocatalysis and electrochemical sensing

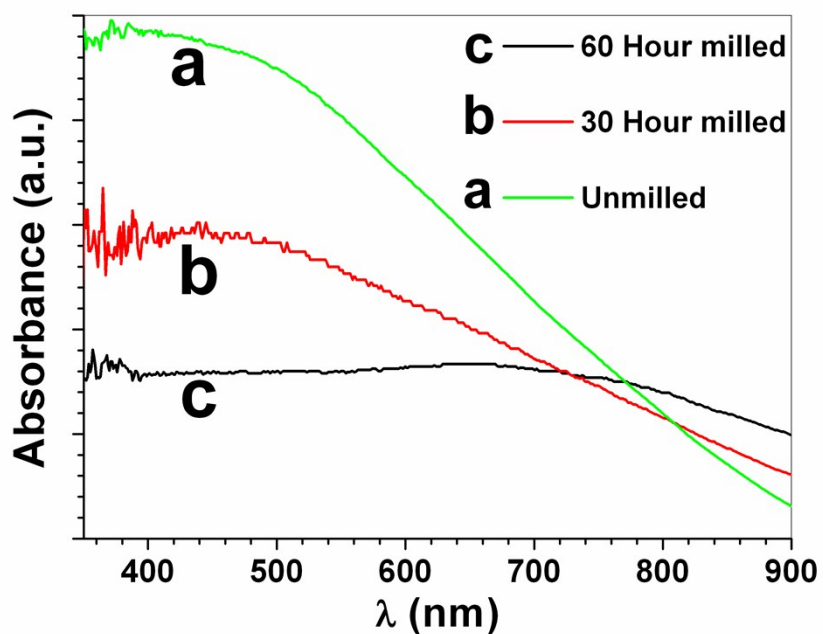

Figure: UV-Vis spectra of CuO-ZnO systems (a) unmilled (b) 30 hour milled and (c) 60 hour milled.
