# Supplementary material for: Mesoporous CuO–ZnO p–n heterojunction based nanocomposites with high specific surface area for enhanced photocatalysis and electrochemical sensing
Source: Royal Society of Chemistry journal article supplement (doi:10.1039/c5cy01573a), 2015-11-24
Supplement: c5cy01573a4.pdf [file c5cy01573a4.pdf]

# Electronic Supplementary Information – 4

Mesoporous CuO-ZnO p-n heterojunction with high specific surface area for  
enhanced photocatalysis and electrochemical sensing

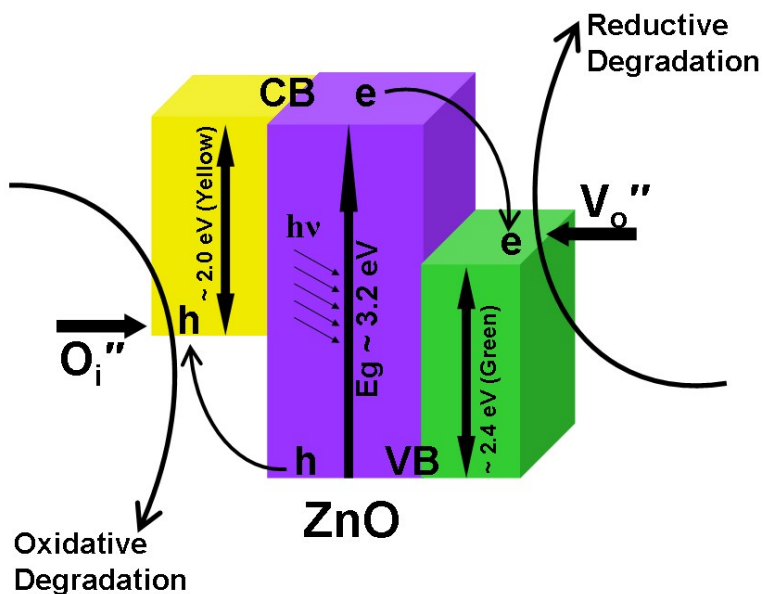

Schematic showing the entrapment of photogenerated electrons and holes in the respective defect levels ( $V_o''$  and  $O_i''$ ) facilitating the reductive and oxidative degradation processes in ZnO during photocatalysis.
